# Supplementary material
Source: publisher figshare collection journal article supplement (https://tandf.figshare.com/articles/dataset/_/19430353)
Supplement: Supplementary file 2 [file 2]

Table S1: Table of coefficients for the additional model fitted with uniqueness point and the pre-uniqueness point data. All predictors were centred and scaled before fitting the model.

|                                       | Estimate | Std. Error | t value |
|---------------------------------------|----------|------------|---------|
| Intercept                             | 6.290    | 0.035      | 181.601 |
| Log phonotactic prob.                 | -0.019   | 0.006      | -3.167  |
| Trial number                          | -0.056   | 0.002      | -30.035 |
| Nbhrd density                         | -0.009   | 0.010      | -0.957  |
| Log moving average response latency   | 0.195    | 0.006      | 31.067  |
| Temporal uniqueness point             | 0.059    | 0.004      | 16.213  |
| N. morph. parses                      | -0.012   | 0.003      | -3.684  |
| Phonological uniqueness point         | -0.057   | 0.007      | -8.218  |
| Log phonotactic prob.*N. morph parses | -0.001   | 0.004      | -0.254  |

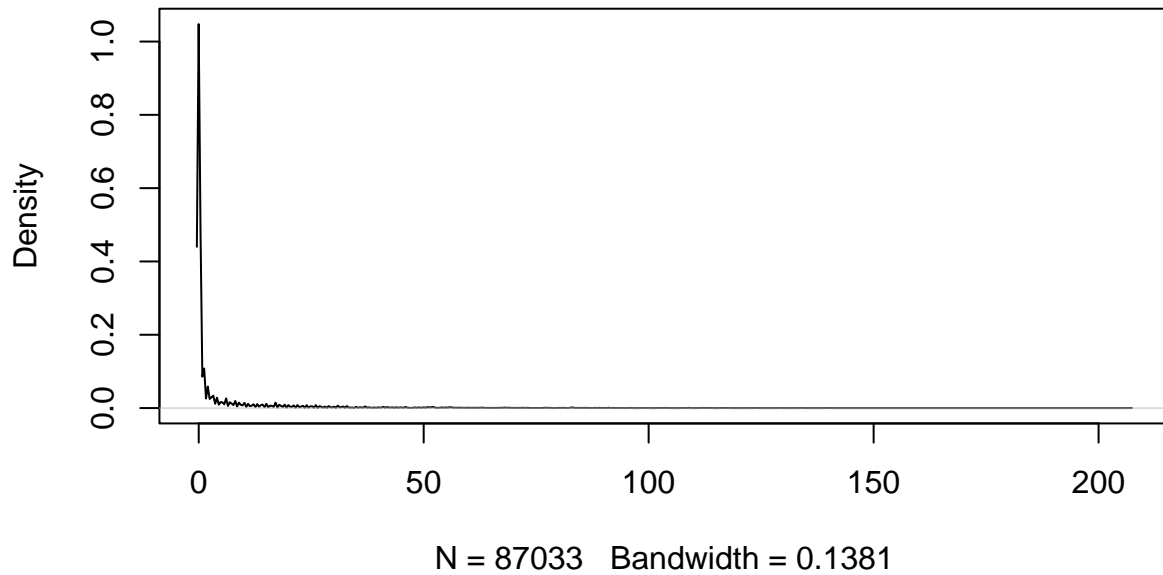

Figure S1: Density plot of the standard calculation of phonological neighbourhood density.

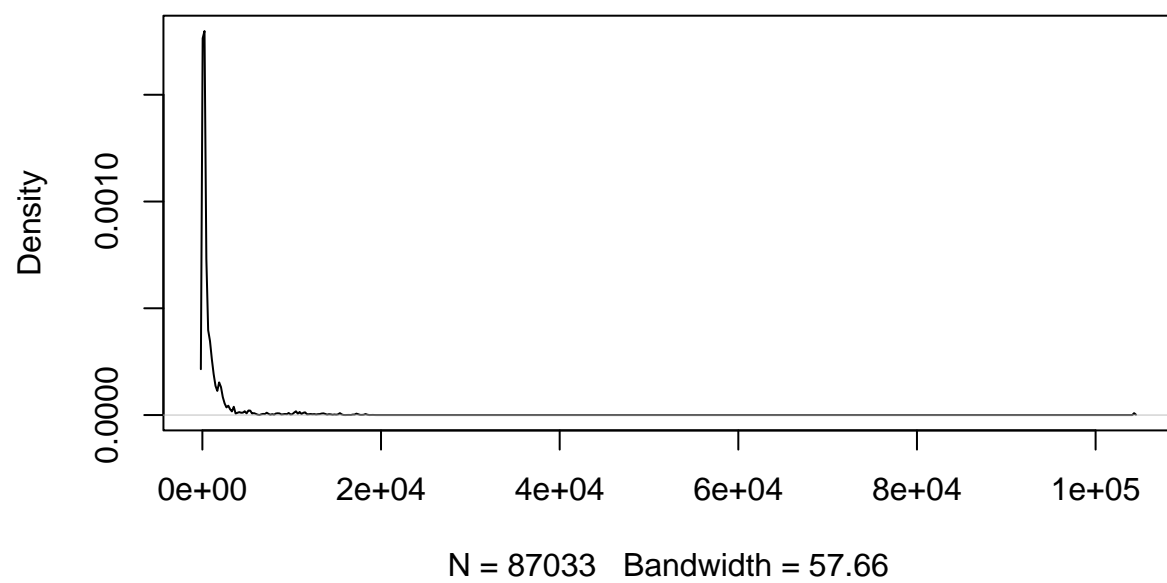

Figure S2: Density plot of the pre-uniqueness point calculation of phonological neighbourhood density.

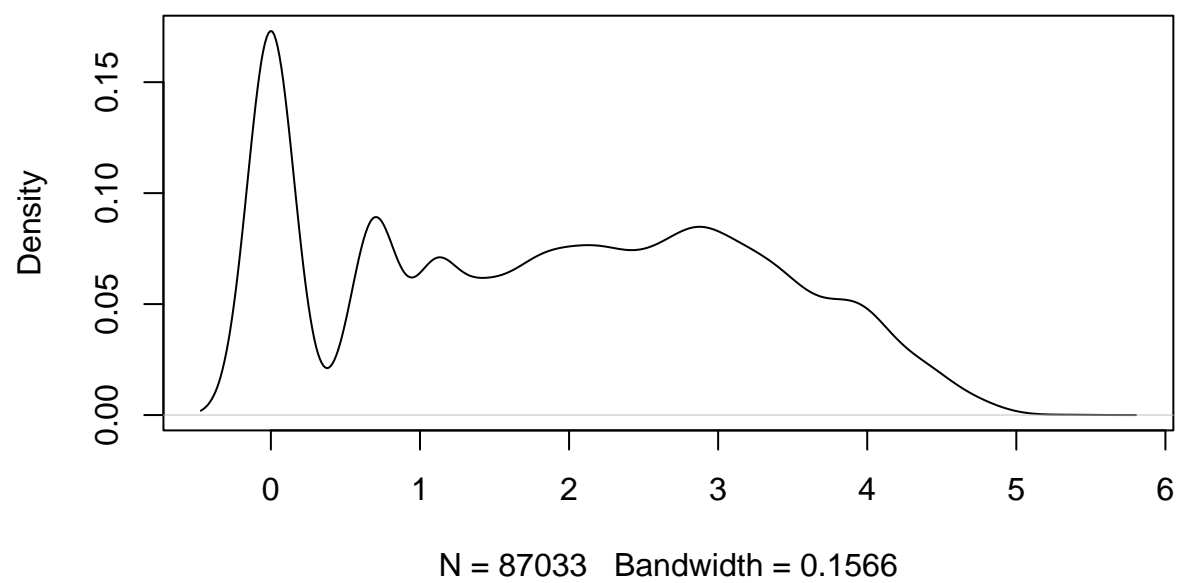

Figure S3: Density plot for the log of the standard calculation of phonological neighbourhood density.

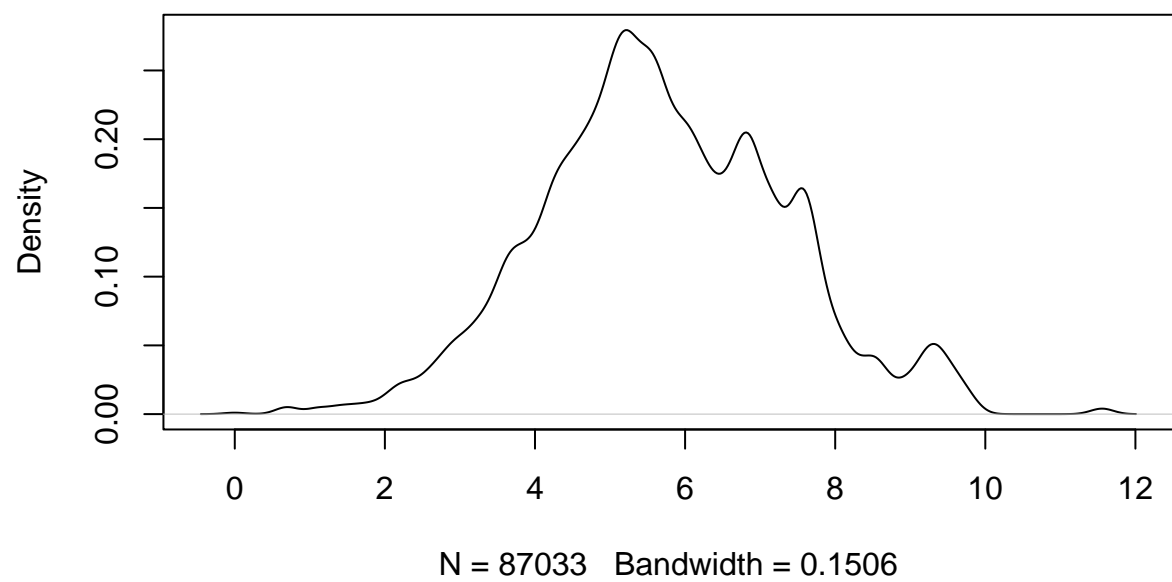

Figure S4: Density plot of the log of the pre-uniqueness point calculation of phonological neighbourhood density.

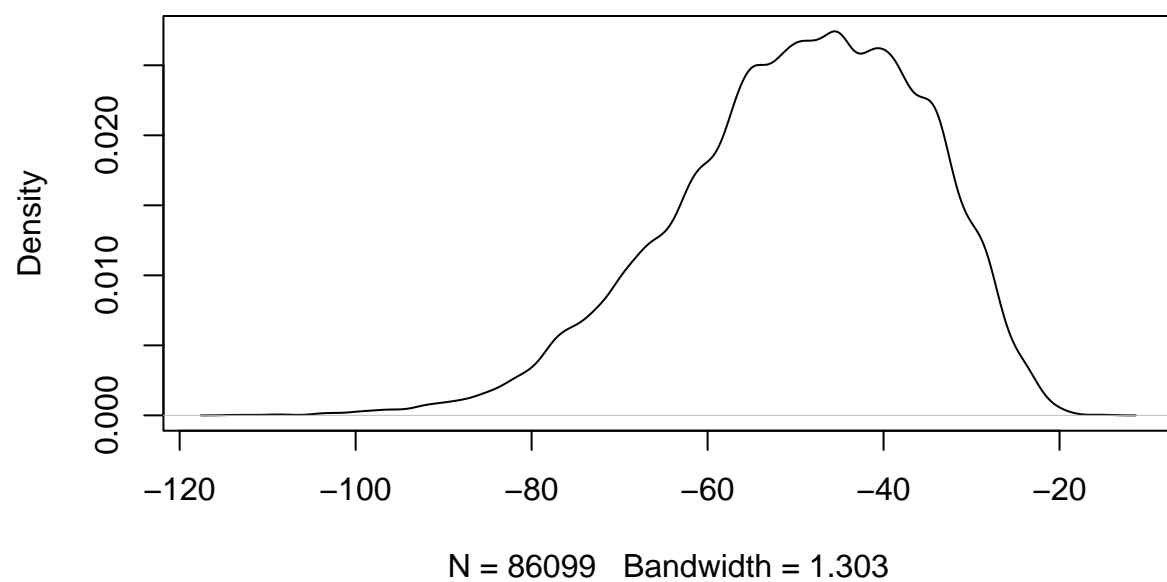

Figure S5: Density plot for standard calculation of log phonotactic probability. Data were additionally subset from the pre-uniqueness point analysis data to remove all 0 values to avoid taking  $\log(0)$ .

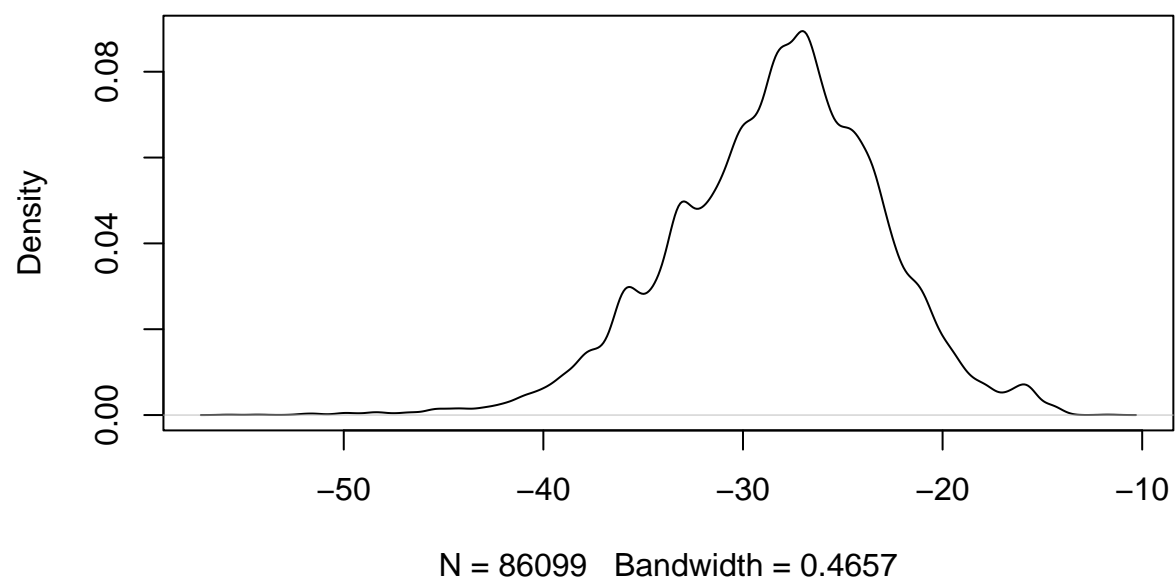

Figure S6: Density plot for pre-uniqueness point calculation of log phonotactic probability.

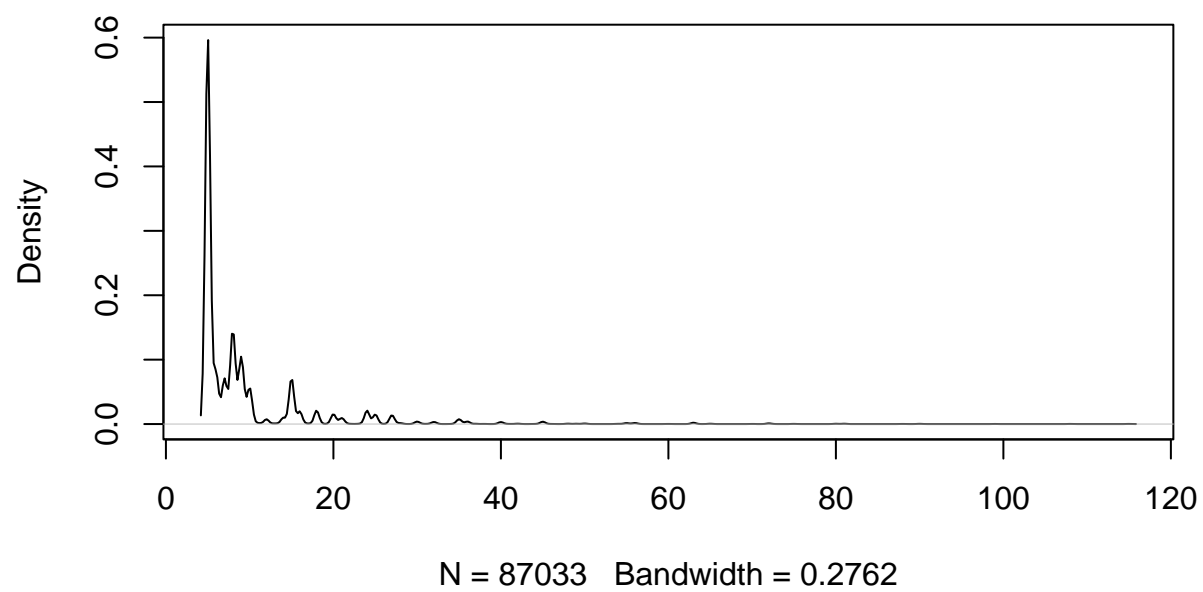

Figure S7: Density plot for standard calculation of number of morphological parses.

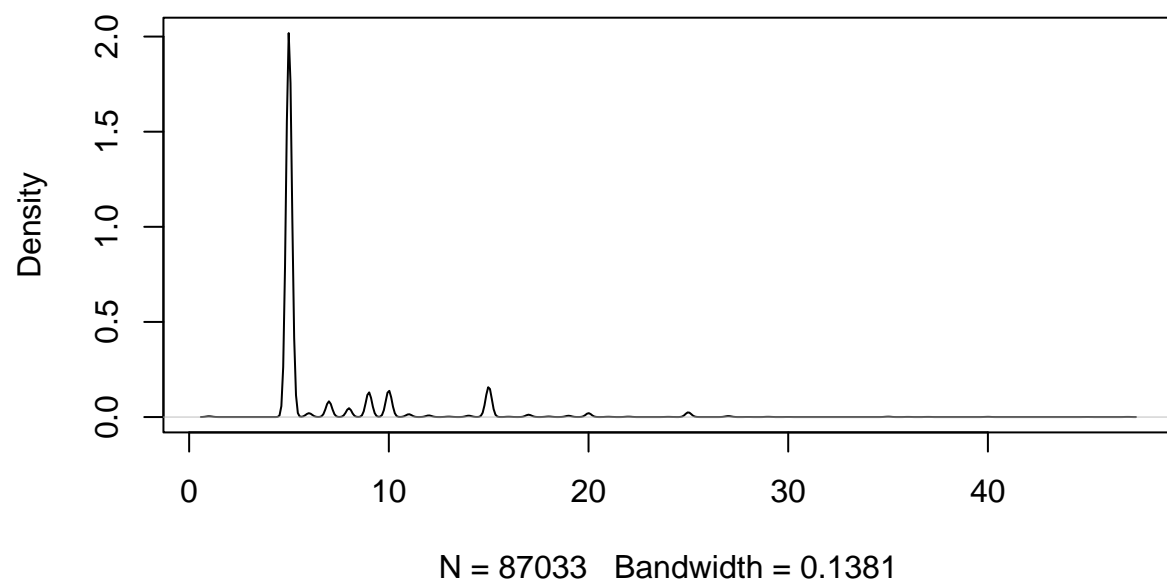

Figure S8: Density plot for pre-uniqueness point calculation of number of morphological parses.
